# Supplementary material
Source: MDPI journal article supplement (https://www.mdpi.com/2071-1050/10/6/1793)
Supplement: s1 [file s1]

## **Questionnaire to determine the impact of various factors on the Supply Chain Competition and Organizational Performance**

Given that the high degree of competitiveness that is currently experienced, companies are focusing on analyzing their Supply Chain (CS) to identify the sources of competitive advantage that allow the company to maintain its place in the market and obtain better performance. organizational There is evidence that there are factors that influence the Supply Chain Management and that they want to analyze the impact they have on their competence and on the performance of the organization.

Click here to help others access the next measurement scale.

| 1        | 2           | 3            | 4             | 5             | 6         |
|----------|-------------|--------------|---------------|---------------|-----------|
| Never    | Hardly ever | Sometimes    | Continued     | Almost always | Always    |
| Very Low | Low         | Slightly low | Slightly high | High          | Very high |

| 1. Please assign a value according to what you live in your company about the Integration of IT (Information Technology) | 1 | 2 | 3 | 4 | 5 | 6 |
|--------------------------------------------------------------------------------------------------------------------------|---|---|---|---|---|---|
| The company has a network of IT systems (ERP, CRM, SCM, Intranet, etc.) highly integrated with key suppliers             |   |   |   |   |   |   |
| The company shares information in real time through IT with key suppliers                                                |   |   |   |   |   |   |
| The company allows access and sharing of sensitive information through IT with key suppliers                             |   |   |   |   |   |   |
| The company works to have a better alignment of IT with key suppliers                                                    |   |   |   |   |   |   |
| The company shares information in real time through IT within the organization                                           |   |   |   |   |   |   |
| The company allows access and sharing of sensitive information through IT within the organization                        |   |   |   |   |   |   |
| The company has a network of IT systems (ERP, CRM, SCM, Intranet, etc.) highly integrated with key customers             |   |   |   |   |   |   |
| The company shares information in real time through IT with key customers                                                |   |   |   |   |   |   |
| The company allows to access and share sensitive information through IT with key customers                               |   |   |   |   |   |   |
| The company works to have a better alignment of IT with key customers                                                    |   |   |   |   |   |   |
| The company has a high degree of feedback through IT                                                                     |   |   |   |   |   |   |
| The company shares demand forecasts and production planning with suppliers                                               |   |   |   |   |   |   |
| The company receives demand forecasts and production planning from its customers                                         |   |   |   |   |   |   |
| 2. Please assign a value according to what you live in your company about the Flexibility of IT                          | 1 | 2 | 3 | 4 | 5 | 6 |
| The company has an IT team that supports IT changes and updates                                                          |   |   |   |   |   |   |
| The company has a high degree of connectivity within the organization and with other organizations                       |   |   |   |   |   |   |
| The company has compatible IT within the organization and with other organizations                                       |   |   |   |   |   |   |
| The company can add, modify and remove IT components easily and without causing negative effects on performance          |   |   |   |   |   |   |
| 3. Please assign a value according to what you live in your company about the IT Update                                  | 1 | 2 | 3 | 4 | 5 | 6 |
| The company uses the most advanced IT for the Supply Chain (CS)                                                          |   |   |   |   |   |   |
| The company invests in IT to align its technology with that of its partners                                              |   |   |   |   |   |   |
| In relation to competitors, the IT of the company for the CS are the most advanced                                       |   |   |   |   |   |   |
| 4. Please assign a value according to what you live in your company about the integration of the CS                      | 1 | 2 | 3 | 4 | 5 | 6 |

|                                                                                                                                                         |          |          |          |          |          |          |
|---------------------------------------------------------------------------------------------------------------------------------------------------------|----------|----------|----------|----------|----------|----------|
| The company develops strategic plans and forecasts in collaboration with key suppliers                                                                  |          |          |          |          |          |          |
| The company has a small number of key suppliers                                                                                                         |          |          |          |          |          |          |
| The company shares information regarding sales, inventory levels and forecasts with key suppliers                                                       |          |          |          |          |          |          |
| The company expects the relationship with key suppliers to be for a long term                                                                           |          |          |          |          |          |          |
| The company expects the relationship with customers to be for a long term                                                                               |          |          |          |          |          |          |
| The company offers services and support to its customers                                                                                                |          |          |          |          |          |          |
| The company measures the satisfaction of its customers                                                                                                  |          |          |          |          |          |          |
| In the company there are inter-functional work groups where matters of materials and design are dealt with jointly                                      |          |          |          |          |          |          |
| Customers are part of the product design process                                                                                                        |          |          |          |          |          |          |
| The company measures the SC performance of its suppliers                                                                                                |          |          |          |          |          |          |
| The company measures the SC performance of its clients                                                                                                  |          |          |          |          |          |          |
| The company has a high level of internal integration                                                                                                    |          |          |          |          |          |          |
| The company has a high degree of information on the status of the SC                                                                                    |          |          |          |          |          |          |
| The company maintains a high level of interdepartmental communication                                                                                   |          |          |          |          |          |          |
| The company maintains strategic relationships with key suppliers based on loyalty and trust                                                             |          |          |          |          |          |          |
| <b>5. Please assign a value according to what you live in your company about the Flexibility of the SC</b>                                              | <b>1</b> | <b>2</b> | <b>3</b> | <b>4</b> | <b>5</b> | <b>6</b> |
| In relation to competitors, we have processes that can adjust to changes in volume and mix of products quickly                                          |          |          |          |          |          |          |
| In relation to competitors, the SC of the company responds faster with quotes                                                                           |          |          |          |          |          |          |
| In relation to competitors, the SC of the company responds more quickly and effectively to changes and needs of the client                              |          |          |          |          |          |          |
| In relation to competitors, the company develops and markets new products more quickly and effectively                                                  |          |          |          |          |          |          |
| The company can ensure the availability of material against changes                                                                                     |          |          |          |          |          |          |
| The company can adapt to delivery schedules and meet customer requirements                                                                              |          |          |          |          |          |          |
| The company maintains different SC configurations for different customer segments                                                                       |          |          |          |          |          |          |
| The company relies on inventories to meet the demand                                                                                                    |          |          |          |          |          |          |
| The company differentiates its products in relation to the life cycle in which they are found                                                           |          |          |          |          |          |          |
| The company maintains different SC channels regarding product differentiation (product, channel, customer)                                              |          |          |          |          |          |          |
| The company can implement structural changes in the organization effectively                                                                            |          |          |          |          |          |          |
| <b>6. Please assign a value according to what you live in your company about the Orientation to learning in the SC</b>                                  | <b>1</b> | <b>2</b> | <b>3</b> | <b>4</b> | <b>5</b> | <b>6</b> |
| The company provides appropriate training and a supportive work environment to develop new capabilities                                                 |          |          |          |          |          |          |
| The company supports the experimental mentality through positive incentives that favor individual initiative and responsibility                         |          |          |          |          |          |          |
| The company provides a psychologically safe environment in which individuals can examine their own mental models without fear of ridicule or harassment |          |          |          |          |          |          |
| There is an exchange of knowledge within the organization based on the lessons learned                                                                  |          |          |          |          |          |          |
| There is knowledge transfer between the different SC partners                                                                                           |          |          |          |          |          |          |
| <b>7. Assign a value according to what you live in your company about the Role of the Manager</b>                                                       | <b>1</b> | <b>2</b> | <b>3</b> | <b>4</b> | <b>5</b> | <b>6</b> |
| The manager shows a high commitment and support for the activities of the SC                                                                            |          |          |          |          |          |          |
| Managers identify changes in the marketplace and commit resources quickly to new courses of action                                                      |          |          |          |          |          |          |
| Managers are used to making plans and following up                                                                                                      |          |          |          |          |          |          |
| The leaders are congruent with the fundamental values of the organization                                                                               |          |          |          |          |          |          |

|                                                                                                                                              |          |          |          |          |          |          |
|----------------------------------------------------------------------------------------------------------------------------------------------|----------|----------|----------|----------|----------|----------|
| Leaders empower the individual, promote collaboration, communication and support                                                             |          |          |          |          |          |          |
| <b>8. Assign a value according to what you live in your company about the Employee Competency</b>                                            | <b>1</b> | <b>2</b> | <b>3</b> | <b>4</b> | <b>5</b> | <b>6</b> |
| The employees have an adequate knowledge of the different functions of the SC                                                                |          |          |          |          |          |          |
| The employees communicate effectively with the different parts of the SC                                                                     |          |          |          |          |          |          |
| The employees are trained and continuously trained to perform the functions of the SC                                                        |          |          |          |          |          |          |
| Employees work as a team constantly to implement inter-organizational projects                                                               |          |          |          |          |          |          |
| Employees identify ways to improve efficiency and effectiveness in the face of environmental changes                                         |          |          |          |          |          |          |
| The company invests in talent acquisition in SC                                                                                              |          |          |          |          |          |          |
| <b>9. Please assign a value according to what you live in your company about the performance of the SC</b>                                   | <b>1</b> | <b>2</b> | <b>3</b> | <b>4</b> | <b>5</b> | <b>6</b> |
| The company can modify its products quickly to meet customer requirements                                                                    |          |          |          |          |          |          |
| The company can quickly introduce new products in the market                                                                                 |          |          |          |          |          |          |
| The company responds quickly to changes in market demand                                                                                     |          |          |          |          |          |          |
| The company complies with the delivery dates and quantities promised consistently                                                            |          |          |          |          |          |          |
| The cycle time to comply with the orders of the clients is short                                                                             |          |          |          |          |          |          |
| The company provides a high level of service to its key customers                                                                            |          |          |          |          |          |          |
| The company considers the management of the SC as vital in the activities of the business                                                    |          |          |          |          |          |          |
| The company offers incentives for performance in SC                                                                                          |          |          |          |          |          |          |
| <b>10. Please assign a value according to what you live in your company about Organizational Performance</b>                                 | <b>1</b> | <b>2</b> | <b>3</b> | <b>4</b> | <b>5</b> | <b>6</b> |
| In relation to key competitors, the performance of the company in profitability is:                                                          |          |          |          |          |          |          |
| In relation to competitors, the performance of the company is higher in Return on Investment (ROI)                                           |          |          |          |          |          |          |
| In relation to competitors, the performance of the company is greater in sales increment                                                     |          |          |          |          |          |          |
| In relation to competitors, the performance of the company is greater in market development                                                  |          |          |          |          |          |          |
| In relation to competitors, the performance of the company is greater in product development                                                 |          |          |          |          |          |          |
| The company has decreased costs as a result of initiatives in SC                                                                             |          |          |          |          |          |          |
| In relation to competitors, the performance of the company is greater in decreasing costs                                                    |          |          |          |          |          |          |
| <b>11. Please assign a value according to what you live in your company about the implementation of GSCM (Green Supply Chain Management)</b> | <b>1</b> | <b>2</b> | <b>3</b> | <b>4</b> | <b>5</b> | <b>6</b> |
| The company is evaluating green initiatives of SC                                                                                            |          |          |          |          |          |          |
| The company is implementing green initiatives on SC                                                                                          |          |          |          |          |          |          |
| The company considers GSC as a strategic priority                                                                                            |          |          |          |          |          |          |
| The green initiatives have the full support of top management in the company                                                                 |          |          |          |          |          |          |
| In relation to competitors, the company's performance is greater in GSC administration                                                       |          |          |          |          |          |          |
| The company considers green initiatives important when selecting its suppliers                                                               |          |          |          |          |          |          |
| The company declares that costs are more important for its customers than decreasing the environmental impact                                |          |          |          |          |          |          |
| The company considers the environmental impact in the design of new products (Green product design)                                          |          |          |          |          |          |          |
| The company implements product return initiatives at the end of its life cycle (reverse logistics)                                           |          |          |          |          |          |          |
| The company implements indicators of environmental impact measurement in its processes                                                       |          |          |          |          |          |          |
| The corporate image benefited from the implementation of green initiatives                                                                   |          |          |          |          |          |          |
| The company generated quantifiable savings as a result of green initiatives in CS (Energy, transport, warehouse, packaging)                  |          |          |          |          |          |          |
| The company increased its market share as a result of green initiatives                                                                      |          |          |          |          |          |          |
| The company generated revenue as a result of green initiatives in CS                                                                         |          |          |          |          |          |          |

|                                                                                                                                  |          |          |          |          |          |          |
|----------------------------------------------------------------------------------------------------------------------------------|----------|----------|----------|----------|----------|----------|
| The company is willing to invest in green initiatives that do not generate return on investment (ROI)                            |          |          |          |          |          |          |
| <b>12. Please assign a value according to what is lived in your company as a result of the implementation of GSCM (Benefits)</b> | <b>1</b> | <b>2</b> | <b>3</b> | <b>4</b> | <b>5</b> | <b>6</b> |
| Product innovation                                                                                                               |          |          |          |          |          |          |
| Process innovation                                                                                                               |          |          |          |          |          |          |
| Costs reduction                                                                                                                  |          |          |          |          |          |          |
| Improvement in business image                                                                                                    |          |          |          |          |          |          |
| Income increase                                                                                                                  |          |          |          |          |          |          |
| Increase in income from organic products                                                                                         |          |          |          |          |          |          |
| Higher product quality                                                                                                           |          |          |          |          |          |          |
| Greater ROI                                                                                                                      |          |          |          |          |          |          |
| Greater participation in the market                                                                                              |          |          |          |          |          |          |
| Reduction of emissions/waste                                                                                                     |          |          |          |          |          |          |
| Energy saving                                                                                                                    |          |          |          |          |          |          |
| Sales increase                                                                                                                   |          |          |          |          |          |          |
| Reduction of logistics costs                                                                                                     |          |          |          |          |          |          |
| Improvement in competitiveness (competitive advantage)                                                                           |          |          |          |          |          |          |
| Customer satisfaction                                                                                                            |          |          |          |          |          |          |
| Promotes inter-organizational trust                                                                                              |          |          |          |          |          |          |

### Demographic data

Industrial \_\_\_\_\_ sector:

Approximate \_\_\_\_\_ number \_\_\_\_\_ of \_\_\_\_\_ employees:

Position \_\_\_\_\_ of \_\_\_\_\_ the \_\_\_\_\_ interviewee:

Years \_\_\_\_\_ of \_\_\_\_\_ experience:

Gender: \_\_\_\_\_

\_\_\_\_\_  
*If you consider it important to add some other factor that impacts the Supply Chain's competence, please write your comment, Thank you very much for your participation.*
